# Supplementary material for: Common MicroRNA Signatures in Cardiac Hypertrophic and Atrophic Remodeling Induced by Changes in Hemodynamic Load
Source: PLoS One. 2010 Dec 9;5(12):e14263. doi: 10.1371/journal.pone.0014263 (PMC3000324; doi:10.1371/journal.pone.0014263)
Supplement: Table S2 — Comparison between the mature human miRNA sequences (as used in the array) and the mature rat miRNA sequences. Sequences have been retrieved from the current version (release 16) of the Sanger miRBase (last access: 30.10.2010). None marks Sequences without annotated rat homologues. The number of nucleotide mismatches is presented in the last column. miRNAs with 0 mismatches are 100% conserved between humans and rats. (0.04 MB XLS) [file pone.0014263.s002.xls]

## Sheet: Sheet4 (2)
Table S2
Conservation analysis of the miRNAs with cardiovascular implications (n=81)
#	Human	Mature human sequence	Rat homologue	Mature rat sequence	Number of nucleotide mismatches
1	hsa-let-7a	UGAGGUAGUAGGUUGUAUAGUU	rno-let-7a	UGAGGUAGUAGGUUGUAUAGUU	0
2	hsa-let-7b	UGAGGUAGUAGGUUGUGUGGUU	rno-let-7b	UGAGGUAGUAGGUUGUGUGGUU	0
3	hsa-let-7c	UGAGGUAGUAGGUUGUAUGGUU	rno-let-7c	UGAGGUAGUAGGUUGUAUGGUU	0
4	hsa-let-7d	AGAGGUAGUAGGUUGCAUAGU	rno-let-7d	AGAGGUAGUAGGUUGCAUAGUU	0
5	hsa-let-7e	UGAGGUAGGAGGUUGUAUAGU	rno-let-7e	UGAGGUAGGAGGUUGUAUAGUU	0
6	hsa-let-7f	UGAGGUAGUAGAUUGUAUAGUU	rno-let-7f	UGAGGUAGUAGAUUGUAUAGUU	0
7	hsa-let-7g	UGAGGUAGUAGUUUGUACAGU	None	n/a	n/a
8	hsa-miR-1	UGGAAUGUAAAGAAGUAUGUA	rno-miR-1	UGGAAUGUAAAGAAGUGUGUAU	1
9	hsa-miR-100	AACCCGUAGAUCCGAACUUGUG	rno-miR-100	AACCCGUAGAUCCGAACUUGUG	0
10	hsa-miR-101	UACAGUACUGUGAUAACUGAAG	rno-miR-101a	UACAGUACUGUGAUAACUGAA	0
11	hsa-miR-103	AGCAGCAUUGUACAGGGCUAUGA	rno-miR-103	AGCAGCAUUGUACAGGGCUAUGA	0
12	hsa-miR-107	AGCAGCAUUGUACAGGGCUAUCA	rno-miR-107	AGCAGCAUUGUACAGGGCUAUCA	0
13	hsa-miR-10a	UACCCUGUAGAUCCGAAUUUGUG	rno-miR-10a-5p	UACCCUGUAGAUCCGAAUUUGUG	0
14	hsa-miR-10b	UACCCUGUAGAACCGAAUUUGU	rno-miR-10b	CCCUGUAGAACCGAAUUUGUGU	0
15	hsa-miR-125b	UCCCUGAGACCCUAACUUGUGA	rno-miR-125b-5p	UCCCUGAGACCCUAACUUGUGA	0
16	hsa-miR-126	CAUUAUUACUUUUGGUACGCG	rno-miR-126*	CAUUAUUACUUUUGGUACGCG	0
17	hsa-miR-130a	CAGUGCAAUGUUAAAAGGGCAU	rno-miR-130a	CAGUGCAAUGUUAAAAGGGCAU	0
18	hsa-miR-133a	UUGGUCCCCUUCAACCAGCUGU	rno-miR-133a	UUUGGUCCCCUUCAACCAGCUG	0
19	hsa-miR-133b	UUGGUCCCCUUCAACCAGCUA	rno-miR-133b	UUUGGUCCCCUUCAACCAGCUA	0
20	hsa-miR-139	UCUACAGUGCACGUGUCU	rno-miR-139-5p	UCUACAGUGCACGUGUCUCCAG	0
21	hsa-miR-140	AGUGGUUUUACCCUAUGGUAG	rno-miR-140	CAGUGGUUUUACCCUAUGGUAG	0
22	hsa-miR-143	UGAGAUGAAGCACUGUAGCUCA	rno-miR-143	UGAGAUGAAGCACUGUAGCUCA	0
23	hsa-miR-146a	UGAGAACUGAAUUCCAUGGGUU	rno-miR-146a	UGAGAACUGAAUUCCAUGGGUU	0
24	hsa-miR-149	UCUGGCUCCGUGUCUUCACUCC	None	n/a	n/a
25	hsa-miR-15a	UAGCAGCACAUAAUGGUUUGUG	None	n/a	n/a
26	hsa-miR-15b	UAGCAGCACAUCAUGGUUUACA	rno-miR-15b	UAGCAGCACAUCAUGGUUUACA	0
27	hsa-miR-16	UAGCAGCACGUAAAUAUUGGCG	rno-miR-16	UAGCAGCACGUAAAUAUUGGCG	0
28	hsa-miR-17-3p	ACUGCAGUGAAGGCACUUGU	rno-miR-17-3p	ACUGCAGUGAAGGCACUUGUGG	0
29	hsa-miR-17-5p	CAAAGUGCUUACAGUGCAGGUAGU	rno-miR-17-5p	CAAAGUGCUUACAGUGCAGGUAG	0
30	hsa-miR-181b	AACAUUCAUUGCUGUCGGUGGG	rno-miR-181b	AACAUUCAUUGCUGUCGGUGGGU	0
31	hsa-miR-182	UUUGGCAAUGGUAGAACUCACA	rno-miR-182	UUUGGCAAUGGUAGAACUCACACCG	0
32	hsa-miR-191	CAACGGAAUCCCAAAAGCAGCU	rno-miR-191	CAACGGAAUCCCAAAAGCAGCUG	0
33	hsa-miR-195	UAGCAGCACAGAAAUAUUGGC	rno-miR-195	UAGCAGCACAGAAAUAUUGGC	0
34	hsa-miR-199a	CCCAGUGUUCAGACUACCUGUUC	rno-miR-199a-5p	CCCAGUGUUCAGACUACCUGUUC	0
35	hsa-miR-199b	CCCAGUGUUUAGACUAUCUGUUC	None	n/a	n/a
36	hsa-miR-19a	UGUGCAAAUCUAUGCAAAACUGA	rno-miR-19a	UGUGCAAAUCUAUGCAAAACUGA	0
37	hsa-miR-19b	UGUGCAAAUCCAUGCAAAACUGA	rno-miR-19b	UGUGCAAAUCCAUGCAAAACUGA	0
38	hsa-miR-208	AUAAGACGAGCAAAAAGCUUGU	rno-miR-208	AUAAGACGAGCAAAAAGCUUGU	0
39	hsa-miR-20a	UAAAGUGCUUAUAGUGCAGGUAG	rno-miR-20a	UAAAGUGCUUAUAGUGCAGGUAG	0
40	hsa-miR-21	UAGCUUAUCAGACUGAUGUUGA	rno-miR-21	UAGCUUAUCAGACUGAUGUUGA	0
41	hsa-miR-210	CUGUGCGUGUGACAGCGGCUGA	rno-miR-210	CUGUGCGUGUGACAGCGGCUGA	0
42	hsa-miR-211	UUCCCUUUGUCAUCCUUCGCCU	rno-miR-211	UUCCCUUUGUCAUCCUUUGCCU	1
43	hsa-miR-214	ACAGCAGGCACAGACAGGCAG	rno-miR-214	ACAGCAGGCACAGACAGGCAG	0
44	hsa-miR-218	UUGUGCUUGAUCUAACCAUGU	rno-miR-218	UUGUGCUUGAUCUAACCAUGU	0
45	hsa-miR-22	AAGCUGCCAGUUGAAGAACUGU	rno-miR-22	AAGCUGCCAGUUGAAGAACUGU	0
46	hsa-miR-221	AGCUACAUUGUCUGCUGGGUUUC	rno-miR-221	AGCUACAUUGUCUGCUGGGUUUC	0
47	hsa-miR-222	AGCUACAUCUGGCUACUGGGUCUC	rno-miR-222	AGCUACAUCUGGCUACUGGGU	0
48	hsa-miR-224	CAAGUCACUAGUGGUUCCGUUUA	rno-miR-224	CAAGUCACUAGUGGUUCCGUUUA	0
49	hsa-miR-23a	AUCACAUUGCCAGGGAUUUCC	rno-miR-23a	AUCACAUUGCCAGGGAUUUCC	0
50	hsa-miR-23b	AUCACAUUGCCAGGGAUUACC	rno-miR-23b	AUCACAUUGCCAGGGAUUACC	0
51	hsa-miR-24	UGGCUCAGUUCAGCAGGAACAG	rno-miR-24	UGGCUCAGUUCAGCAGGAACAG	0
52	hsa-miR-25	CAUUGCACUUGUCUCGGUCUGA	rno-miR-25	CAUUGCACUUGUCUCGGUCUGA	0
53	hsa-miR-26a	UUCAAGUAAUCCAGGAUAGGC	rno-miR-26a	UUCAAGUAAUCCAGGAUAGGCU	0
54	hsa-miR-26b	UUCAAGUAAUUCAGGAUAGGUU	rno-miR-26b	UUCAAGUAAUUCAGGAUAGGU	0
55	hsa-miR-27a	UUCACAGUGGCUAAGUUCCGC	rno-miR-27a	UUCACAGUGGCUAAGUUCCGC	0
56	hsa-miR-27b	UUCACAGUGGCUAAGUUCUGC	rno-miR-27b	UUCACAGUGGCUAAGUUCUGC	0
57	hsa-miR-28	AAGGAGCUCACAGUCUAUUGAG	rno-miR-28	AAGGAGCUCACAGUCUAUUGAG	0
58	hsa-miR-29a	UAGCACCAUCUGAAAUCGGUU	rno-miR-29a	UAGCACCAUCUGAAAUCGGUUA	0
59	hsa-miR-29c	UAGCACCAUUUGAAAUCGGU	rno-miR-29c	UAGCACCAUUUGAAAUCGGUUA	0
60	hsa-miR-30a-3p	CUUUCAGUCGGAUGUUUGCAGC	rno-miR-30a*	CUUUCAGUCGGAUGUUUGCAGC	0
61	hsa-miR-30a-5p	UGUAAACAUCCUCGACUGGAAG	rno-miR-30a	UGUAAACAUCCUCGACUGGAAG	0
62	hsa-miR-30b	UGUAAACAUCCUACACUCAGCU	rno-miR-30b-5p	UGUAAACAUCCUACACUCAGCU	0
63	hsa-miR-30c	UGUAAACAUCCUACACUCUCAGC	rno-miR-30c	UGUAAACAUCCUACACUCUCAGC	0
64	hsa-miR-30d	UGUAAACAUCCCCGACUGGAAG	rno-miR-30d	UGUAAACAUCCCCGACUGGAAG	0
65	hsa-miR-30e-3p	CUUUCAGUCGGAUGUUUACAGC	rno-miR-30e*	CUUUCAGUCGGAUGUUUACAGC	0
66	hsa-miR-30e-5p	UGUAAACAUCCUUGACUGGA	rno-miR-30e	UGUAAACAUCCUUGACUGGAAG	0
67	hsa-miR-31	GGCAAGAUGCUGGCAUAGCUG	rno-miR-31	AGGCAAGAUGCUGGCAUAGCUG	0
68	hsa-miR-320	AAAAGCUGGGUUGAGAGGGCGAA	rno-miR-320	AAAAGCUGGGUUGAGAGGGCGA	0
69	hsa-miR-342	UCUCACACAGAAAUCGCACCCGUC	rno-miR-342-3p	UCUCACACAGAAAUCGCACCCGU	0
70	hsa-miR-372	AAAGUGCUGCGACAUUUGAGCGU	None	n/a	n/a
71	hsa-miR-378	CUCCUGACUCCAGGUCCUGUGU	rno-miR-378*	CUCCUGACUCCAGGUCCUGUGU	0
72	hsa-miR-422b	CUGGACUUGGAGUCAGAAGGCC	rno-miR-378	ACUGGACUUGGAGUCAGAAGG	0
73	hsa-miR-423	AGCUCGGUCUGAGGCCCCUCAG	rno-miR-423	AGCUCGGUCUGAGGCCCCUCAGU	0
74	hsa-miR-424	CAGCAGCAAUUCAUGUUUUGAA	rno-miR-322	CAGCAGCAAUUCAUGUUUUGGA	1
75	hsa-miR-451	AAACCGUUACCAUUACUGAGUUU	rno-miR-451	AAACCGUUACCAUUACUGAGUU	0
76	hsa-miR-484	UCAGGCUCAGUCCCCUCCCGAU	rno-miR-484	UCAGGCUCAGUCCCCUCCCGAU	0
77	hsa-miR-486	UCCUGUACUGAGCUGCCCCGAG	None	n/a	n/a
78	hsa-miR-497	CAGCAGCACACUGUGGUUUGU	rno-miR-497	CAGCAGCACACUGUGGUUUGUA	0
79	hsa-miR-92	UAUUGCACUUGUCCCGGCCUG	rno-miR-92a	UAUUGCACUUGUCCCGGCCUG	0
80	hsa-miR-93	AAAGUGCUGUUCGUGCAGGUAG	rno-miR-93	CAAAGUGCUGUUCGUGCAGGUAG	0
81	hsa-miR-99b	CACCCGUAGAACCGACCUUGCG	rno-miR-99b	CACCCGUAGAACCGACCUUGCG	0
